# Supplementary material for: Optogenetically transduced human ES cell-derived neural progenitors and their neuronal progenies: Phenotypic characterization and responses to optical stimulation
Source: PubMed Central journal article supplement (PMC6844486; doi:10.1371/journal.pone.0224846), 2019-11-11
Supplement: pone.0224846.s015.pdf [file pone.0224846.s015.pdf]

Table S1. Primers used for genomic DNA PCR to detect integrated channelrhodopsin (ChR2) and eYFP genes.

| Primers              | Sequences (5' to 3') |
|----------------------|----------------------|
| EYFP-FW              | ACGTAAACGGCCACAAGTTC |
| EYFP-RV              | AAGTCGTGCTGCTTCATGTG |
| SP PLENTI-SYN (ChR2) | GGTCCCTGAGGATCAATG   |
| AS PLENTI-SYN (ChR2) | TACGGTGGAGCCATAGACG  |
